# Supplementary material for: Synthesis, characterization and properties of furan-containing difluoroboron complexes
Source: Royal Society of Chemistry journal article supplement (doi:10.1039/c6ra20489a), 2016-01-01
Supplement: c6ra20489a1.pdf [file c6ra20489a1.pdf]

## ESI for

### **Synthesis, characterization and properties of furan-containing difluoroboron complexes**

Chun Liu\*, Hao Zhang and Jianzhang Zhao

[\*] Dr. C. Liu, Corresponding Author.

State Key Laboratory of Fine Chemicals, Dalian University of Technology, Lingong

Road 2, Dalian 116024, China.

Tel.: +86-411-84986182.

E-mail: cliu@dlut.edu.cn

# Content

X-ray Structural Analysis and Summary of crystal data. *Page S3- S4*

NMR and MS Spectra for Ligands and BF<sub>2</sub> Complexes *Page S5- S21*

References *Page S21*

## X-ray Structural Analysis

Crystals suitable were grown by slow diffusion of n-hexane into the respective solutions of **F2** or **F3** in chloroform at room temperature. Reflection data were collected at 296 (2) K using a graphite monochromator with Mo-K $\alpha$  radiation ( $\lambda = 0.71073$  Å) on a Bruker SMART APEX(II) CCD diffractometer. The collected frames were processed with the software SAINT and an absorption correction (SADABS) was used to the collected reflections. The resulting structure was solved by the Direct or Patterson methods (SHELXTL 97) in conjunction with standard difference Fourier techniques and then refined by full-matrix least-square technique on  $F^2$ . All hydrogen atoms were positioned geometrically and non-hydrogen atoms were refined anisotropically. Relevant crystal data for the structures are collected in Table S1.

CCDC-1486089 (for **F2**), 1482992 (for **F3**) contain the supplementary crystallographic data for this paper. These data can be obtained free of charge from The Cambridge Crystallographic Data Centre via [www.ccdc.cam.ac.uk/data\\_request/cif](http://www.ccdc.cam.ac.uk/data_request/cif).

**Table S1** Summary of crystal data.

| Complexes                                 | <b>F2</b>                                                      | <b>F3</b>                                                      |
|-------------------------------------------|----------------------------------------------------------------|----------------------------------------------------------------|
| CCDC number                               | 1486089                                                        | 1482992                                                        |
| Moiety formula                            | C <sub>23</sub> H <sub>15</sub> BF <sub>2</sub> O <sub>3</sub> | C <sub>20</sub> H <sub>15</sub> BF <sub>2</sub> O <sub>4</sub> |
| formula weight                            | 388.16                                                         | 368.13                                                         |
| temperature, K                            | 296(2)                                                         | 296(2)                                                         |
| wavelength (Å)                            | 0.71073                                                        | 0.71073                                                        |
| crystal system                            | Monoclinic                                                     | Triclinic                                                      |
| space group                               | P2(1)/c                                                        | P-1                                                            |
| unit cell dimensions                      |                                                                |                                                                |
| a (Å)                                     | 16.880                                                         | 8.808                                                          |
| b (Å)                                     | 9.056                                                          | 13.609                                                         |
| c (Å)                                     | 11.782                                                         | 14.247                                                         |
| $\alpha$ (deg)                            | 90                                                             | 76.62                                                          |
| $\beta$ (deg)                             | 97.50                                                          | 87.56                                                          |
| $\gamma$ (deg)                            | 90                                                             | 88.26                                                          |
| volume (Å <sup>3</sup> )                  | 1785.6                                                         | 1659.6                                                         |
| Z                                         | 4                                                              | 4                                                              |
| density, calcd (g/cm <sup>3</sup> )       | 1.444                                                          | 1.473                                                          |
| Absorption coefficient(mm <sup>-1</sup> ) | 0.108                                                          | 0.115                                                          |
| F(000)                                    | 800                                                            | 760                                                            |
| $\theta$ range for data collection(deg)   | 2.43-25.00                                                     | 2.36-27.52                                                     |
| reflections collected                     | 8561 / 3136<br>[R(int) = 0.0436]                               | 12058 / 7508<br>[R(int) = 0.1034]                              |
| refinement method                         | Full-matrix<br>least-squares<br>on $F^2$                       | Full-matrix<br>least-squares<br>on $F^2$                       |
| data/restraints/parameters                | 3136 / 0 / 262                                                 | 7508 / 0 / 487                                                 |
| goodness-of-fit on $F^2$ [a]              | 1.017                                                          | 1.042                                                          |
| final R indices [ $I > 2\sigma(I)$ ] [b]  | 0.0517                                                         | 0.0535                                                         |
| R indices (all data)                      | 0.0879                                                         | 0.0638                                                         |

$$[\text{a}] \text{ goodness - of - fit} = \left\{ \left( \frac{\sum [w(F_0^2 - F_C^2)^2]}{N_{\text{obs}} - N_{\text{param}}} \right) \right\}^{1/2}$$

$$[\text{b}] R_1 = \frac{\sum |F_0| - |F_C|}{\sum |F_0|}. \quad \text{wR2} = \left\{ \frac{\sum [w(F_0^2 - F_C^2)^2]}{\sum [w(F_0^2)^2]} \right\}^{1/2}$$

# NMR and MS Spectra for Ligands and BF<sub>2</sub> Complexes

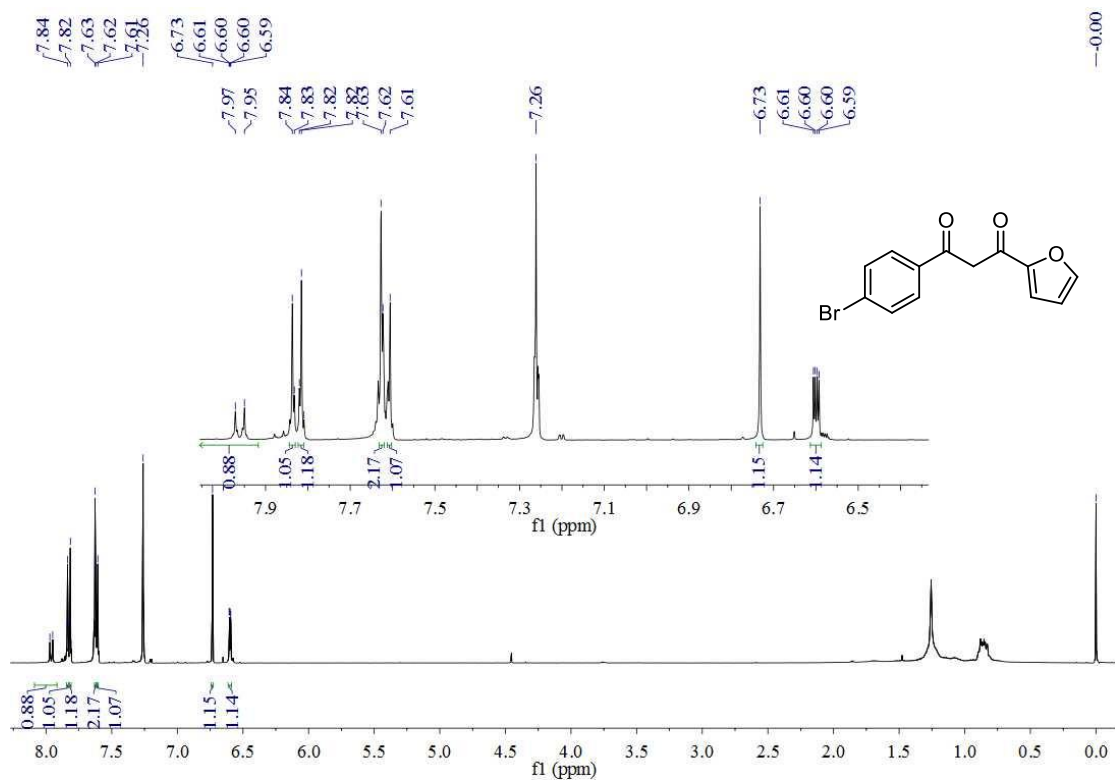

Figure S1. The <sup>1</sup>H NMR spectrum of Compound 3 in CDCl<sub>3</sub>.

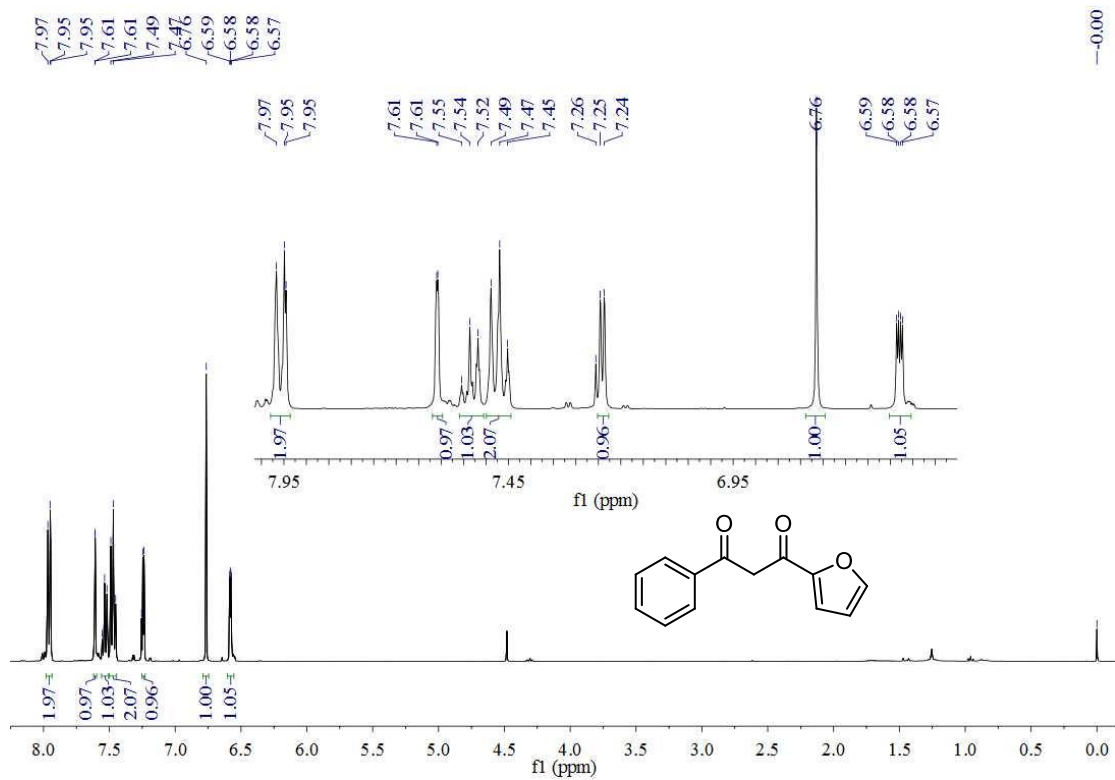

Figure S2. The <sup>1</sup>H NMR spectrum of Ligand LF0 in CDCl<sub>3</sub>.

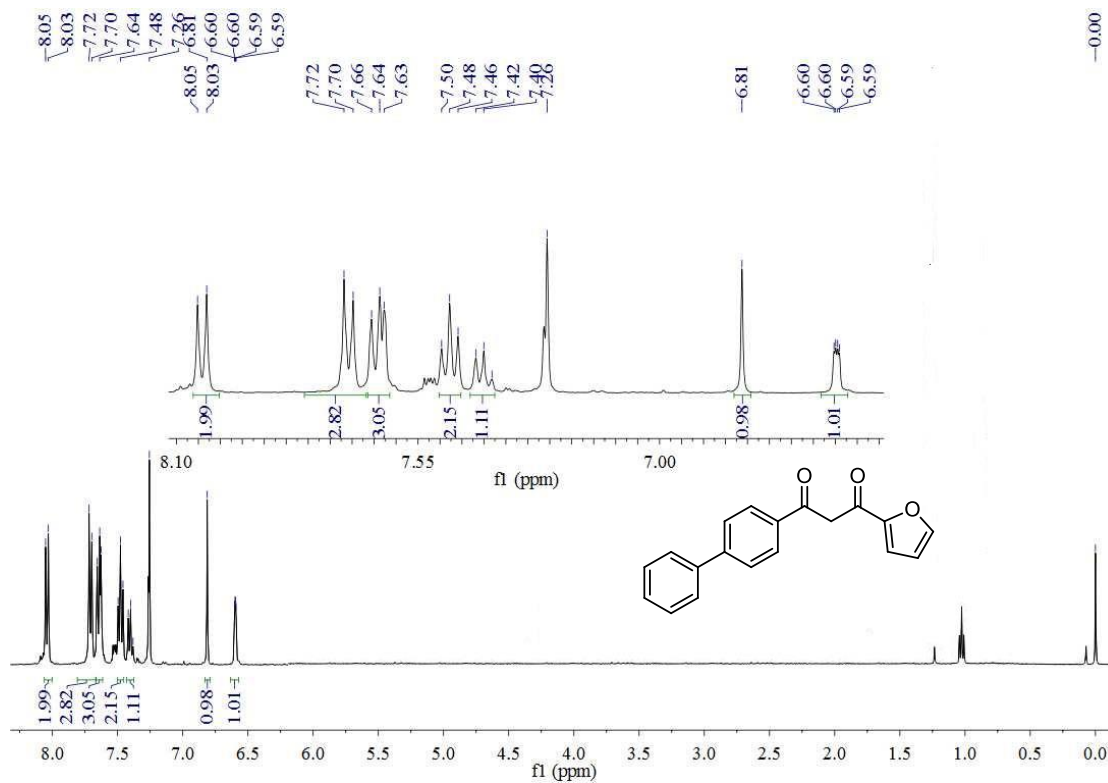

Figure S3. The  $^1\text{H}$  NMR spectrum of Ligand LF1 in  $\text{CDCl}_3$ .

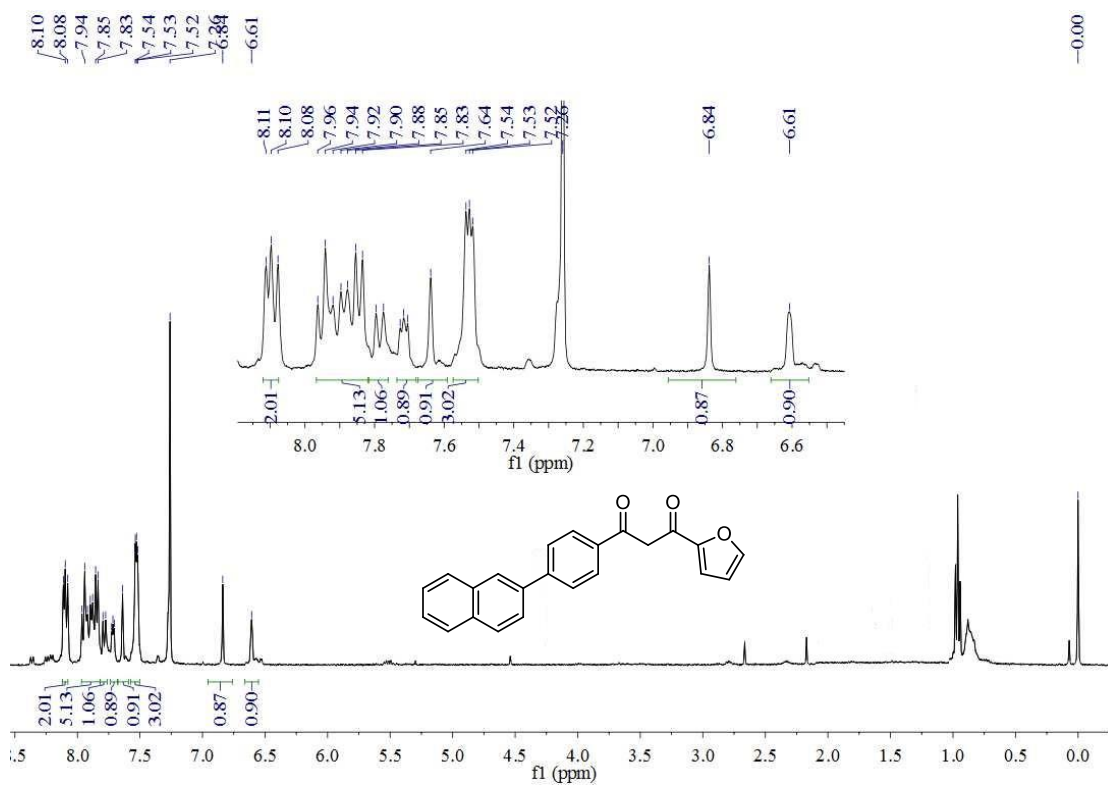

Figure S4. The  $^1\text{H}$  NMR spectrum of Ligand LF2 in  $\text{CDCl}_3$ .

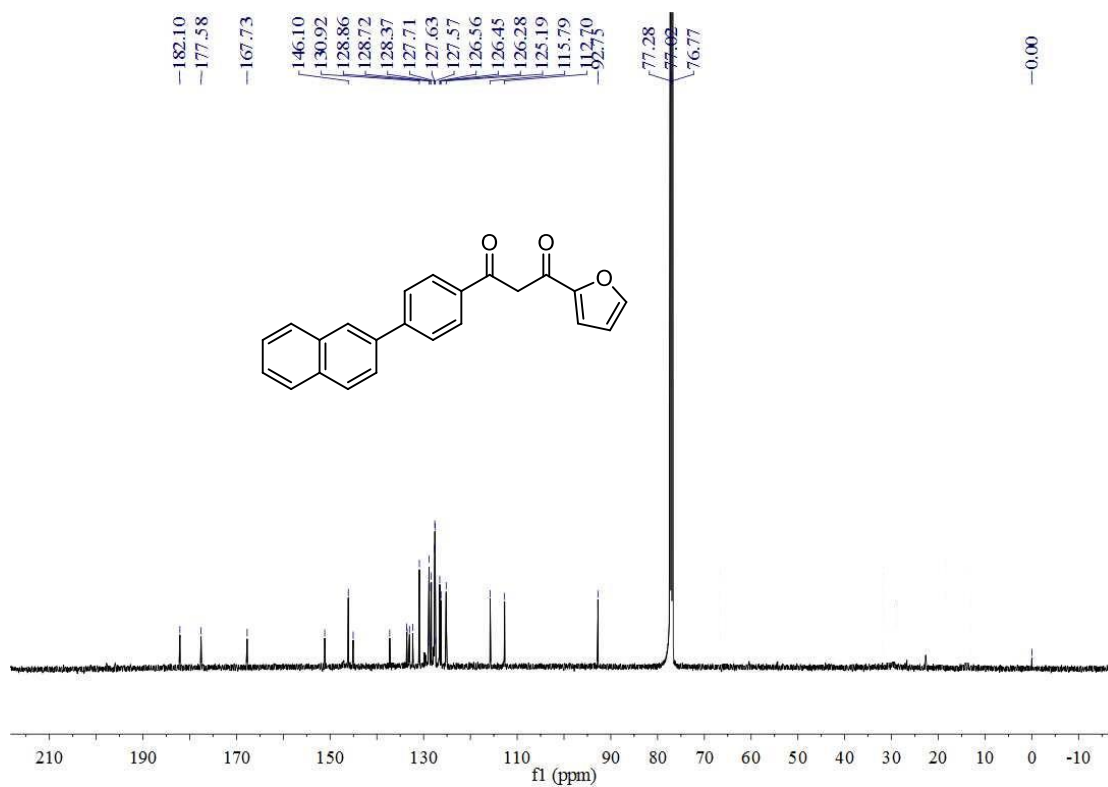

Figure S5. The  $^{13}\text{C}$  NMR spectrum of Ligand LF2 in  $\text{CDCl}_3$ .

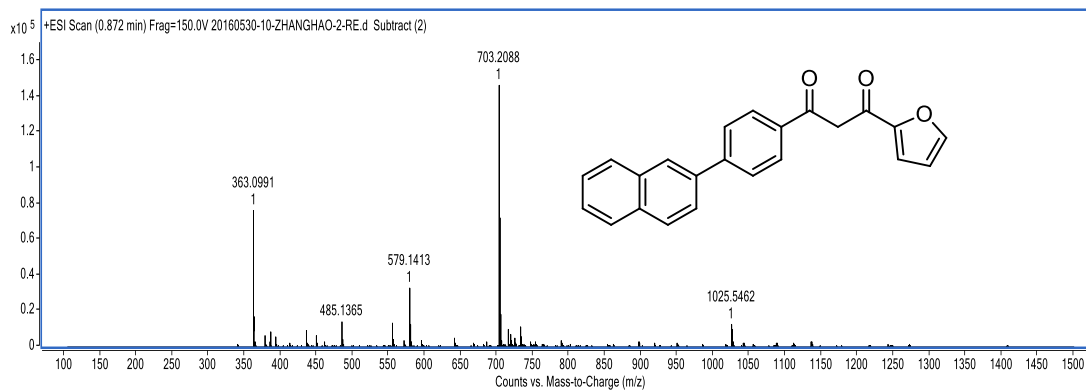

Figure S6. The HRMS spectrum of Ligand LF2.

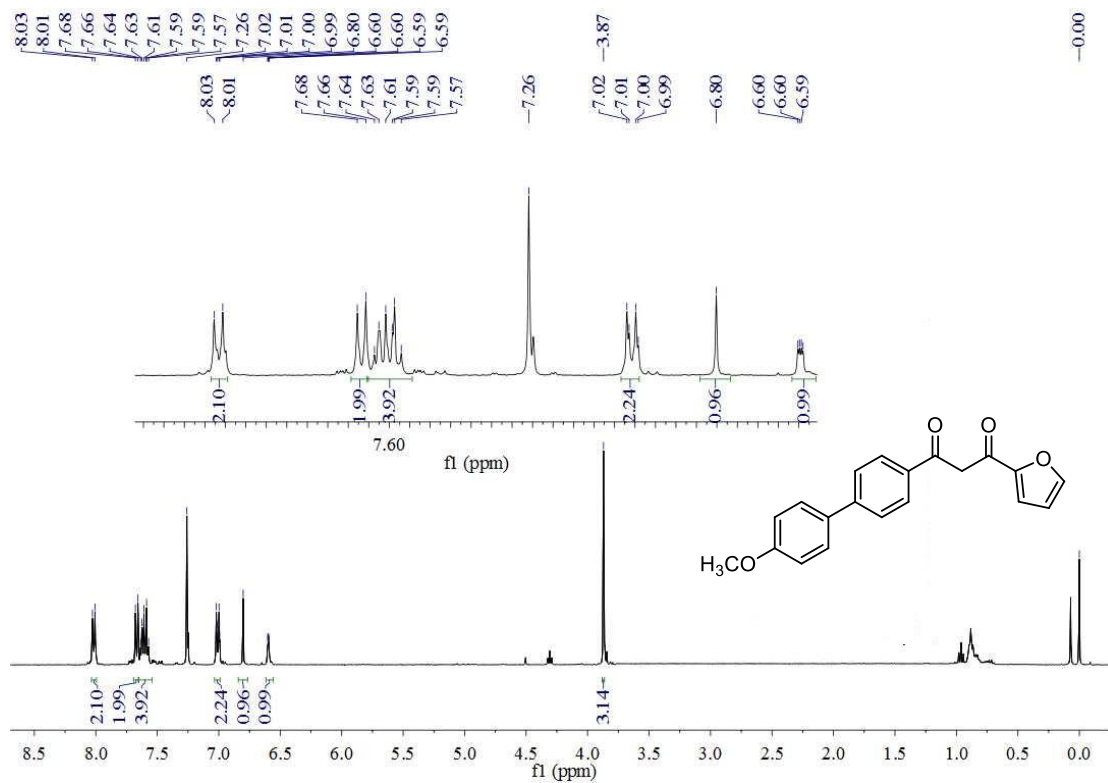

Figure S7. The <sup>1</sup>H NMR spectrum of Ligand LF3 in CDCl<sub>3</sub>.

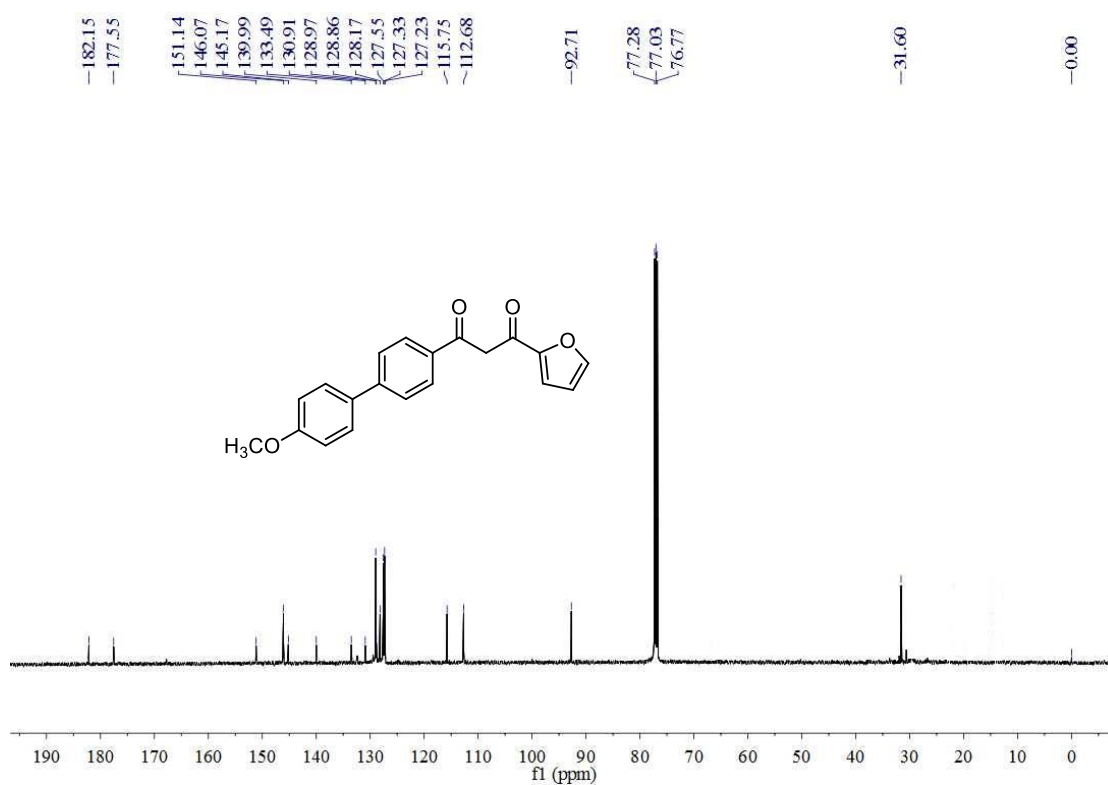

Figure S8. The <sup>13</sup>C NMR spectrum of Ligand LF3 in CDCl<sub>3</sub>.



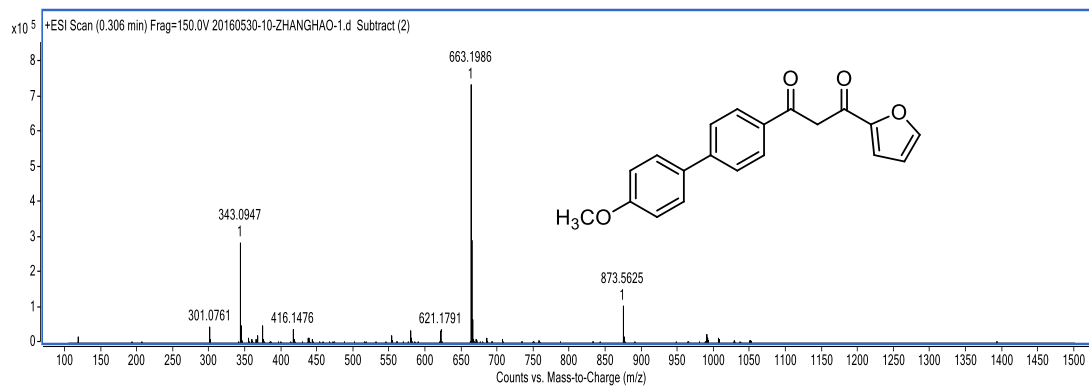

Figure S9. The HRMS spectrum of Ligand LF3.

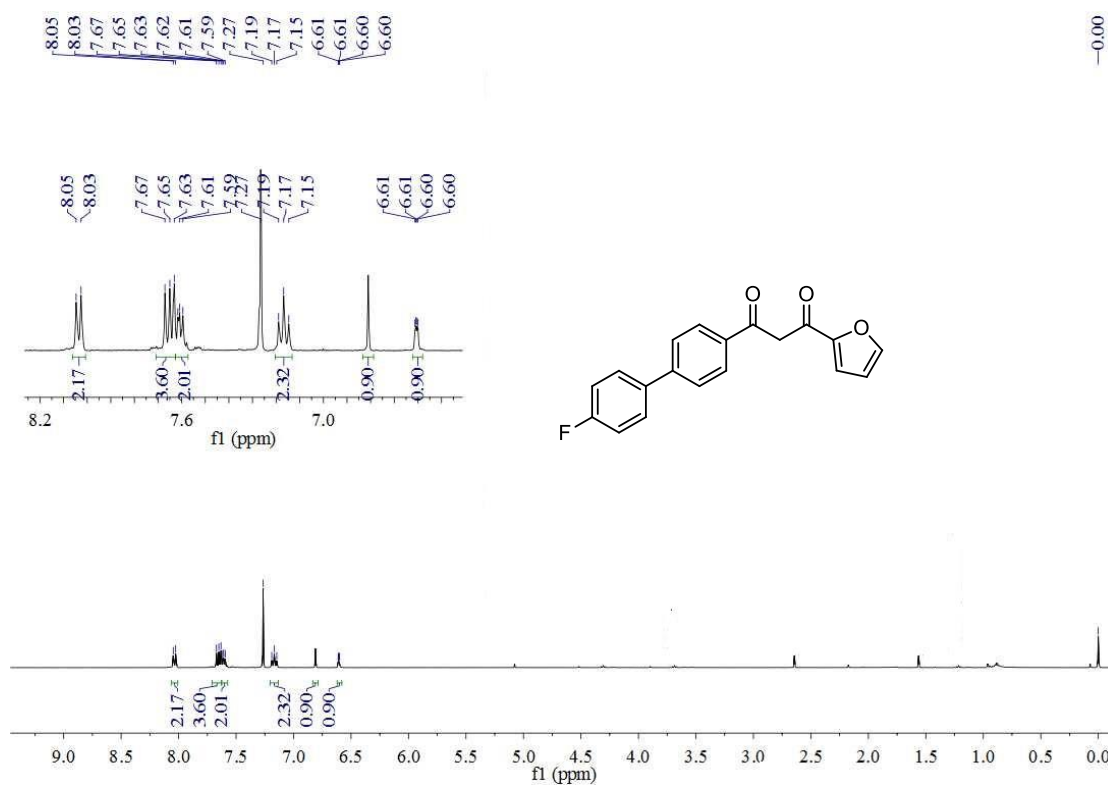

Figure S10. The  $^1\text{H}$  NMR spectrum of Ligand LF4 in  $\text{CDCl}_3$ .

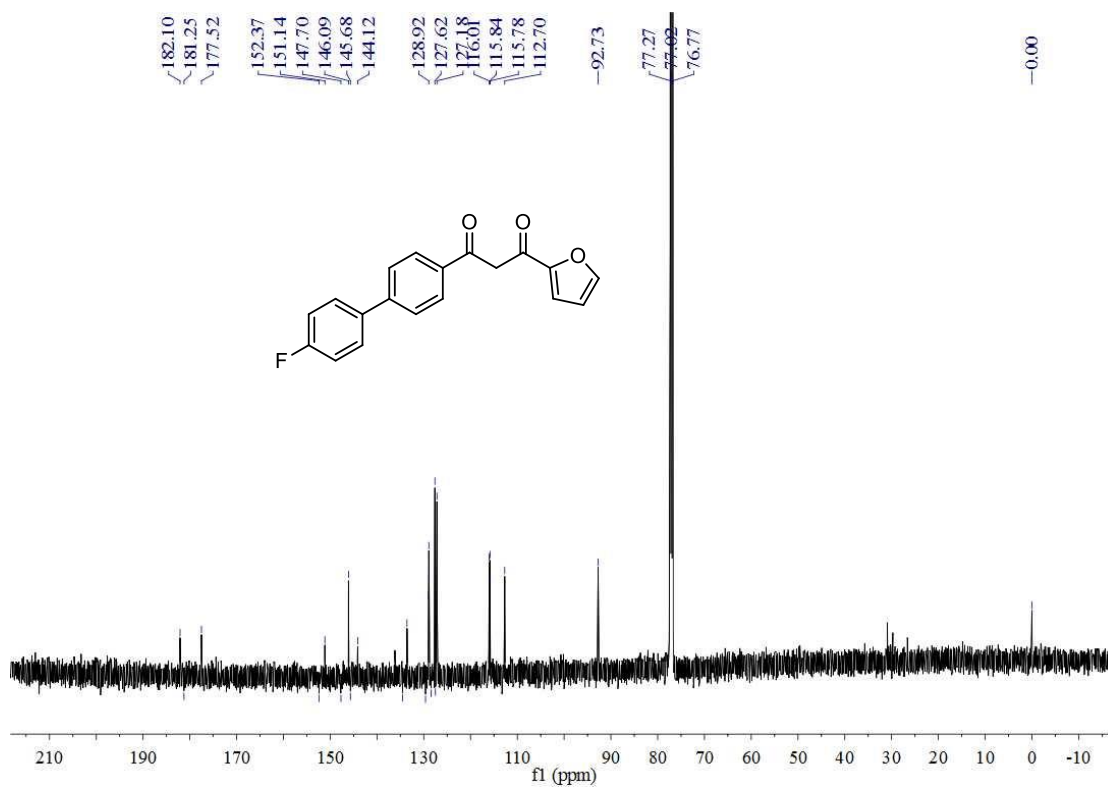

Figure S11. The  $^{13}\text{C}$  NMR spectrum of Ligand LF4 in  $\text{CDCl}_3$ .

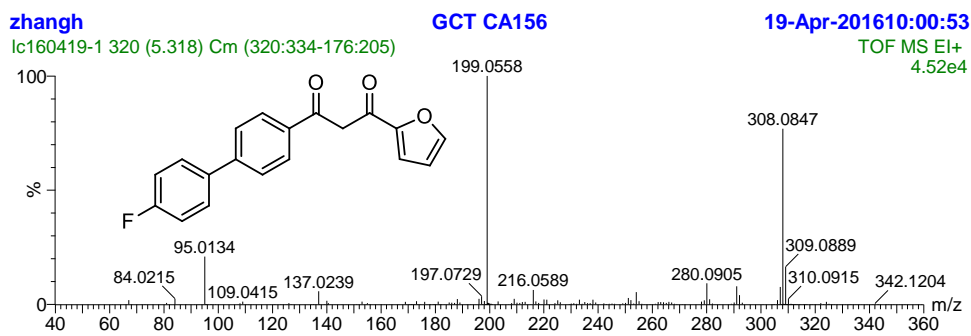

Figure S12. The HRMS spectrum of Ligand LF4.

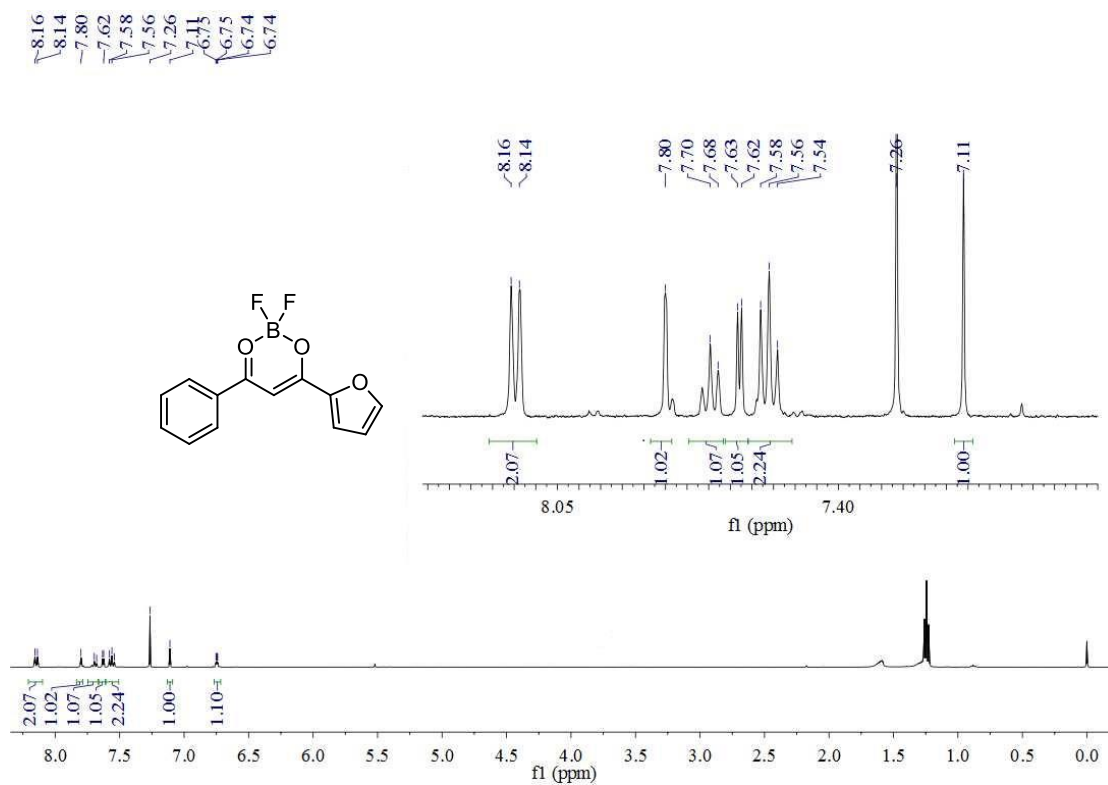

Figure S13. The <sup>1</sup>H NMR spectrum of complex **F0** in CDCl<sub>3</sub>.

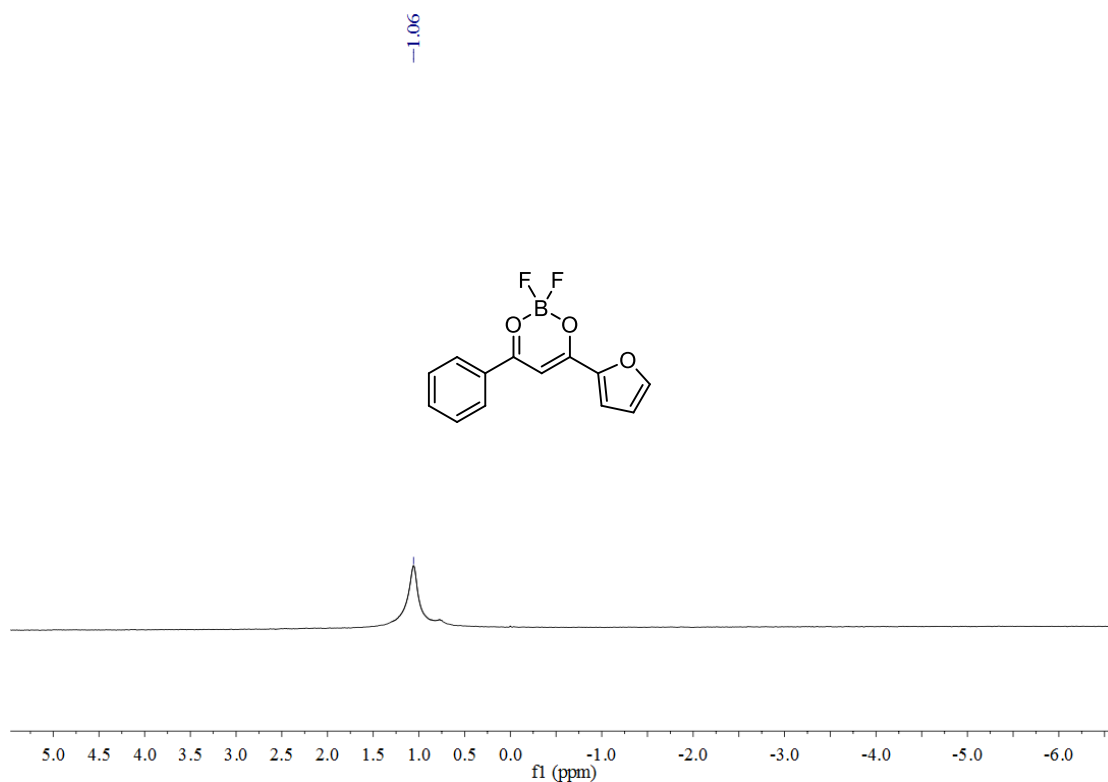

Figure S14. The <sup>11</sup>B NMR spectrum of complex **F0** in CDCl<sub>3</sub>.

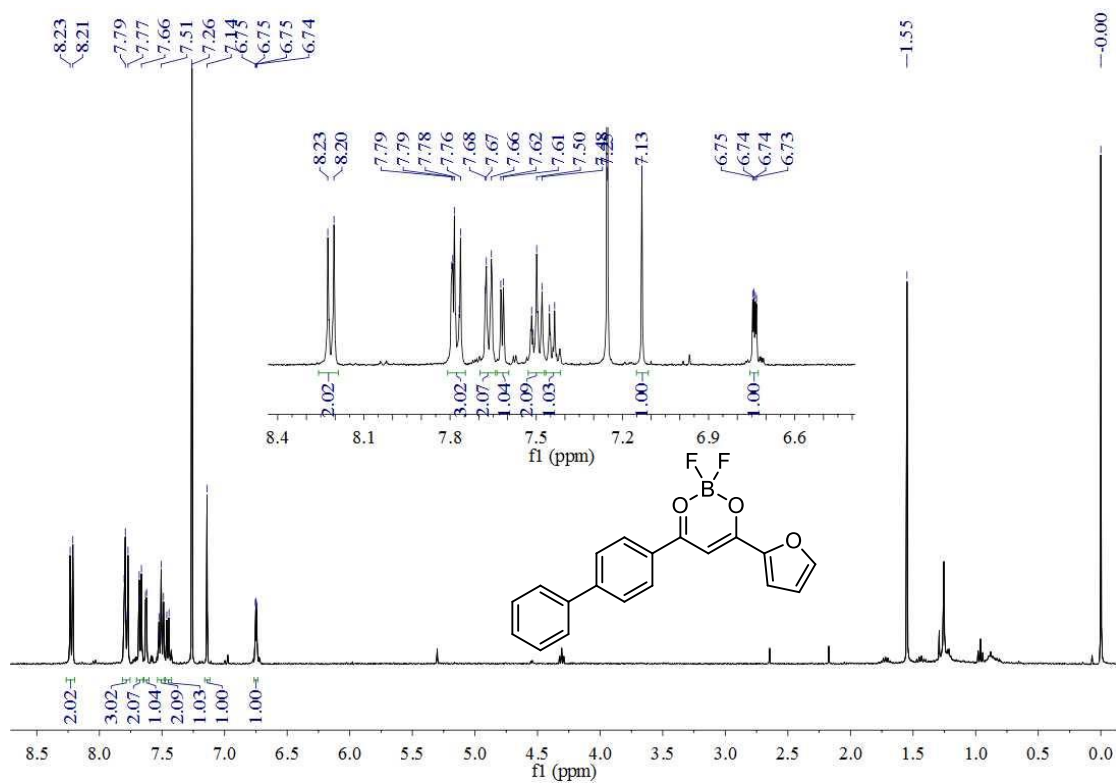

Figure S15. The <sup>1</sup>H NMR spectrum of complex F1 in CDCl<sub>3</sub>.

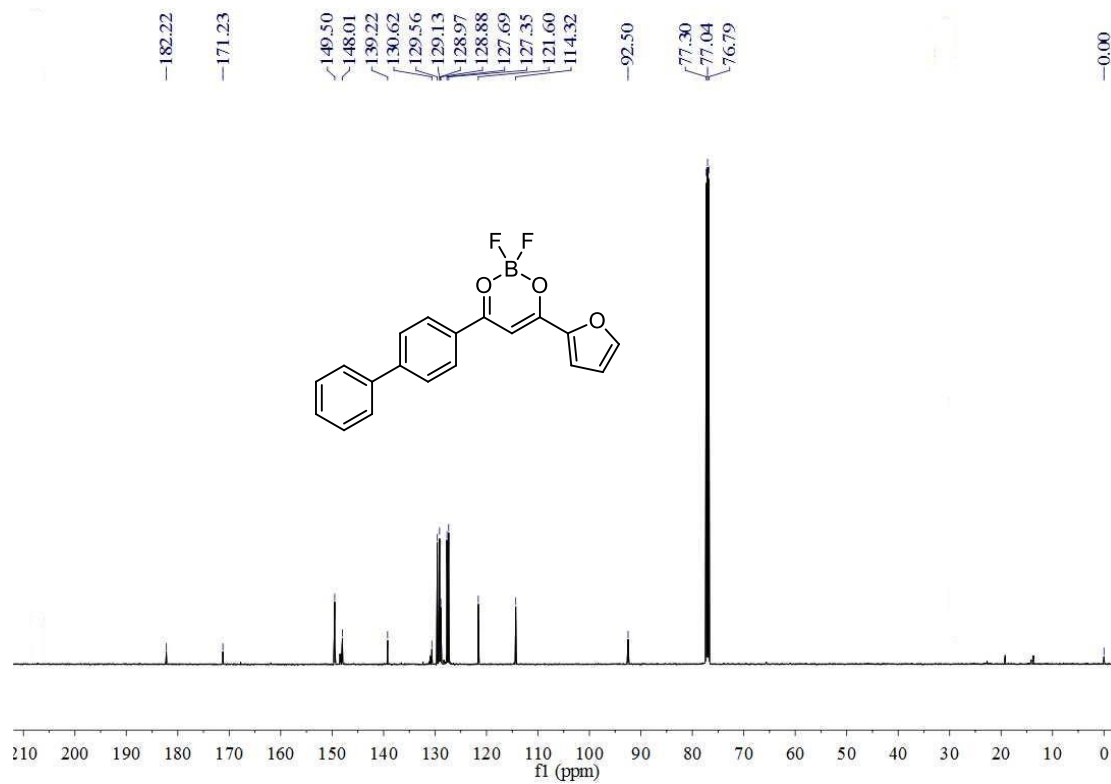

Figure S16. The <sup>13</sup>C NMR spectrum of complex F1 in CDCl<sub>3</sub>.

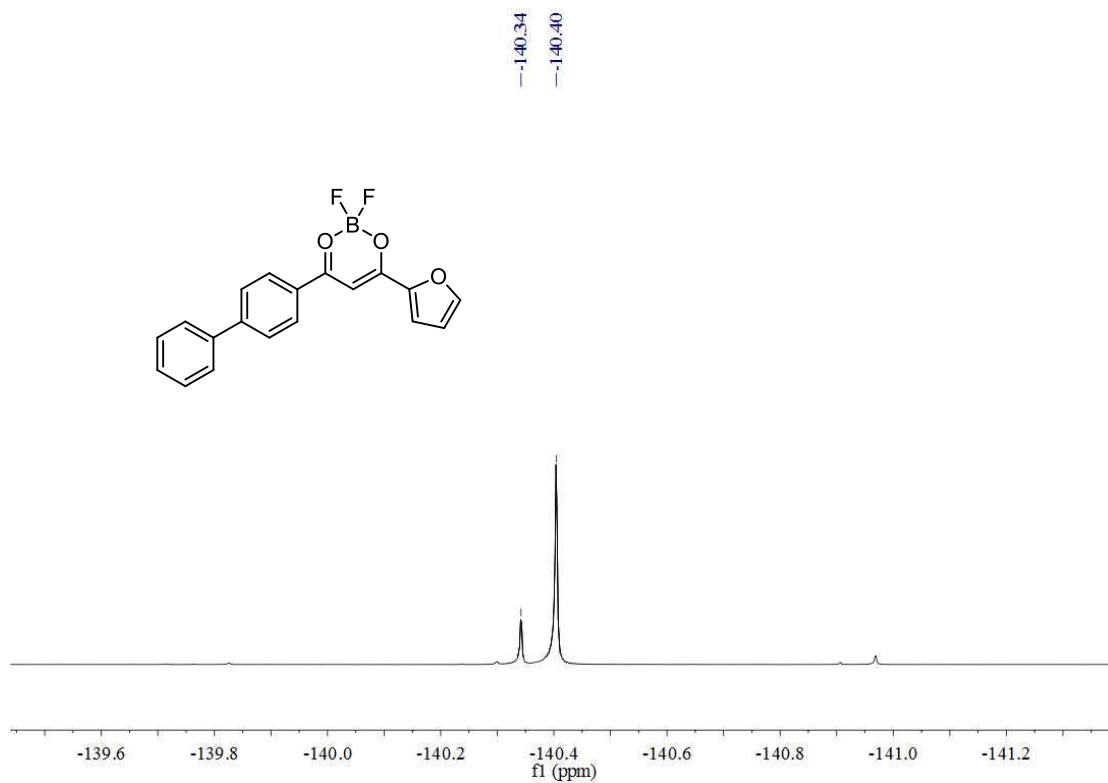

Figure S17. The  $^{19}\text{F}$  NMR spectrum of complex F1 in  $\text{CDCl}_3$ .

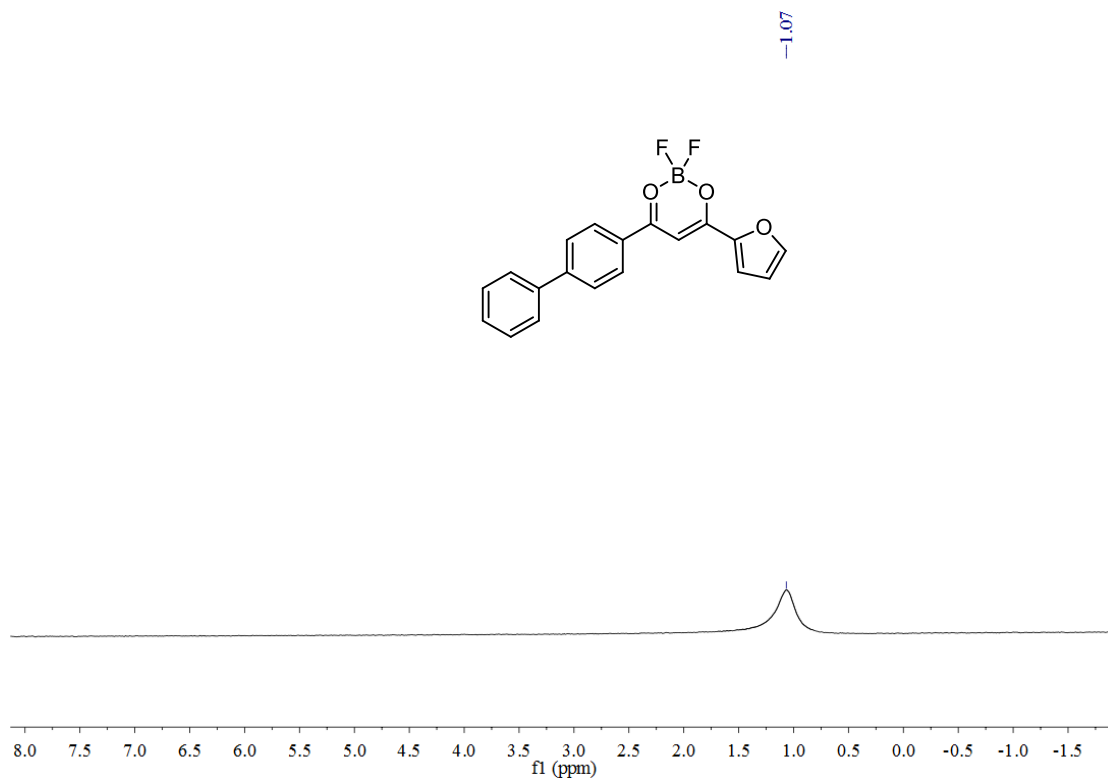

Figure S18. The  $^{11}\text{B}$  NMR spectrum of complex F1 in  $\text{CDCl}_3$ .

zhangh

GCT CA156

24-Dec-2015 14:10:46

lc151224-2 389 (6.484) Cm (389:420-152:221)

TOF MS EI+  
3.14e5

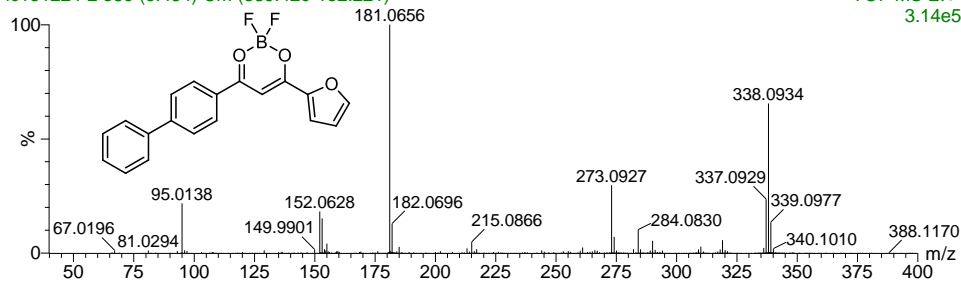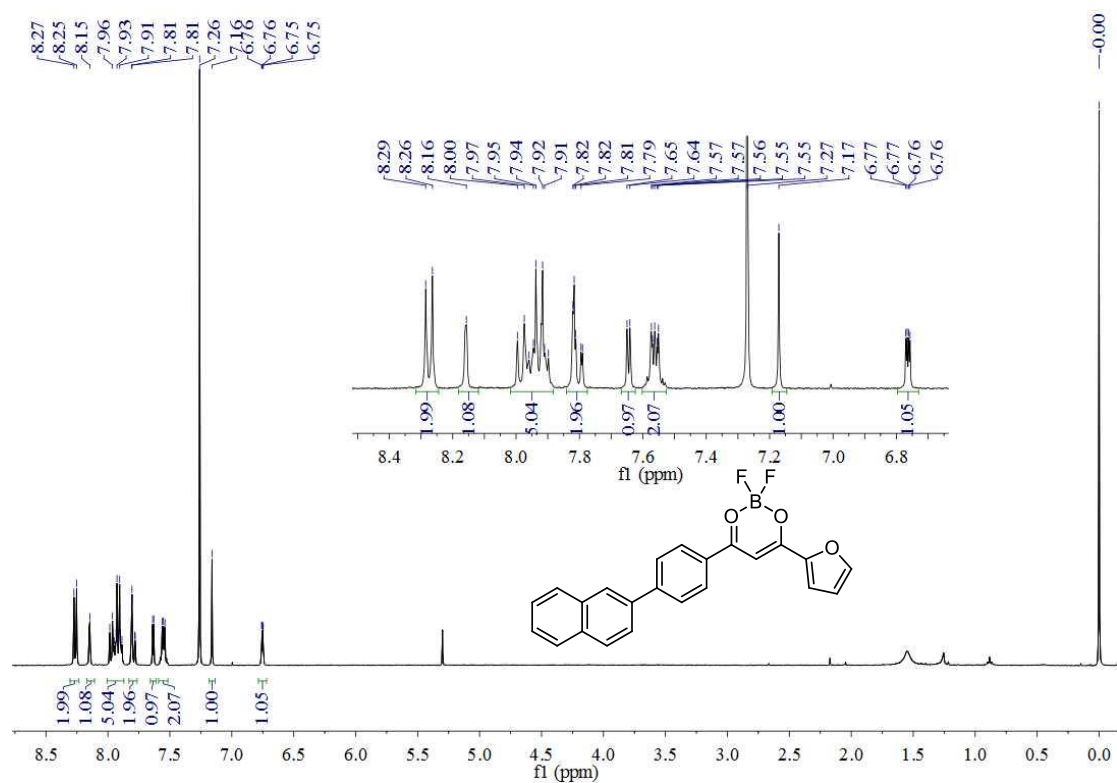

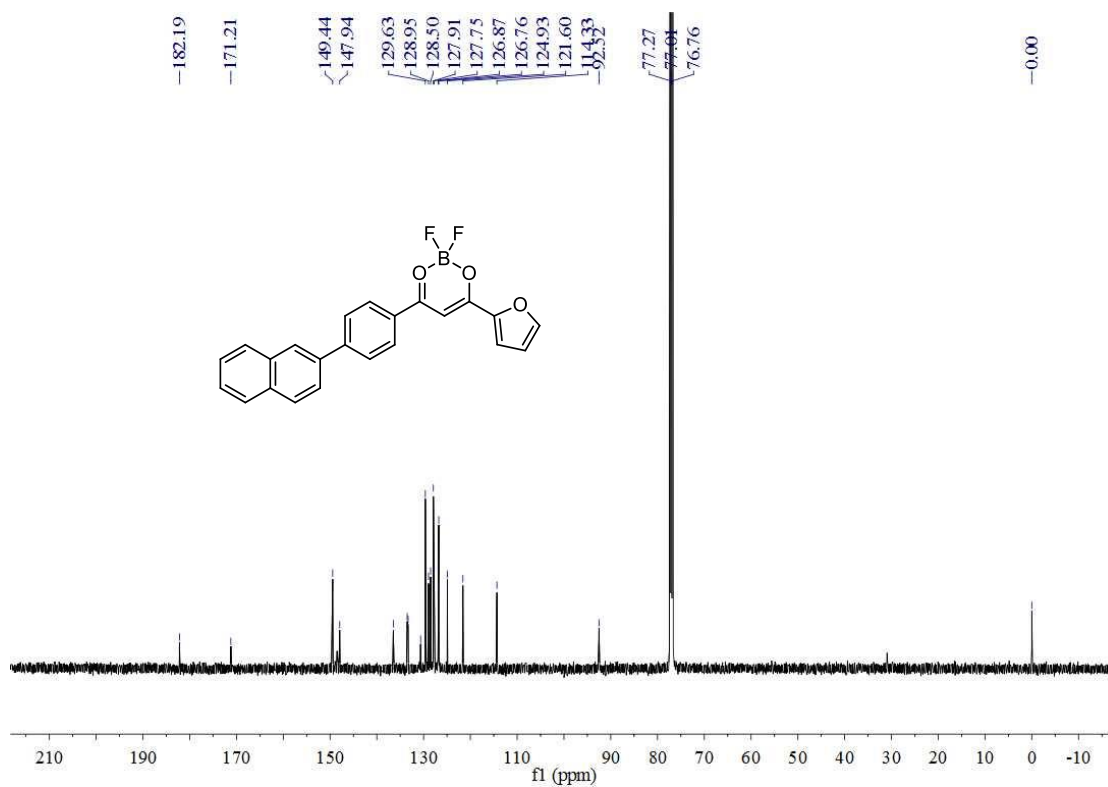

Figure S21. The <sup>13</sup>C NMR spectrum of complex F2 in CDCl<sub>3</sub>.

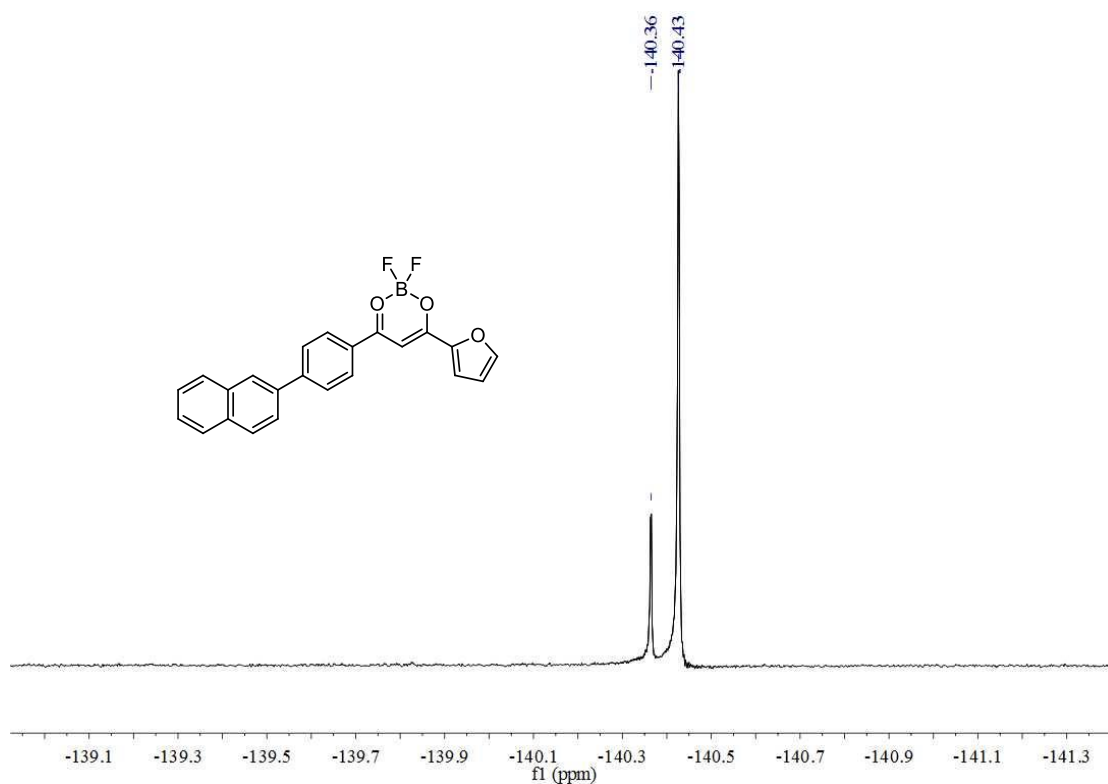

Figure S22. The <sup>19</sup>F NMR spectrum of complex F2 in CDCl<sub>3</sub>.

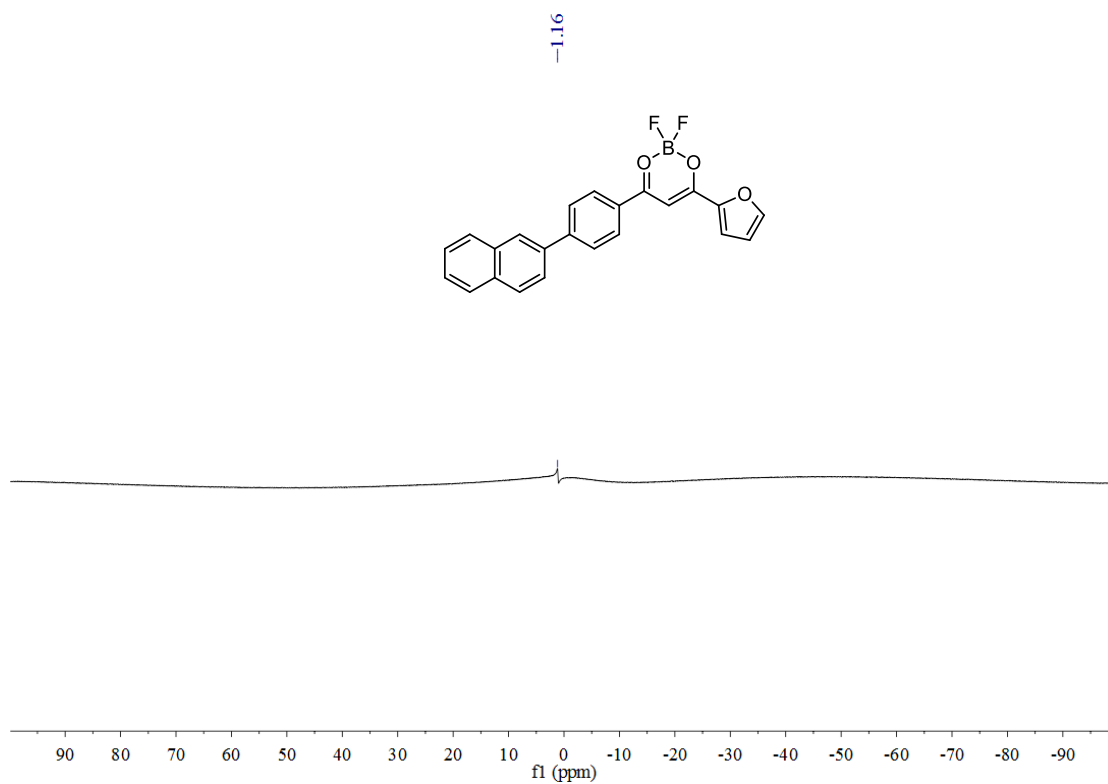

**Figure S23.** The  $^{11}\text{B}$  NMR spectrum of complex **F2** in  $\text{CDCl}_3$ .

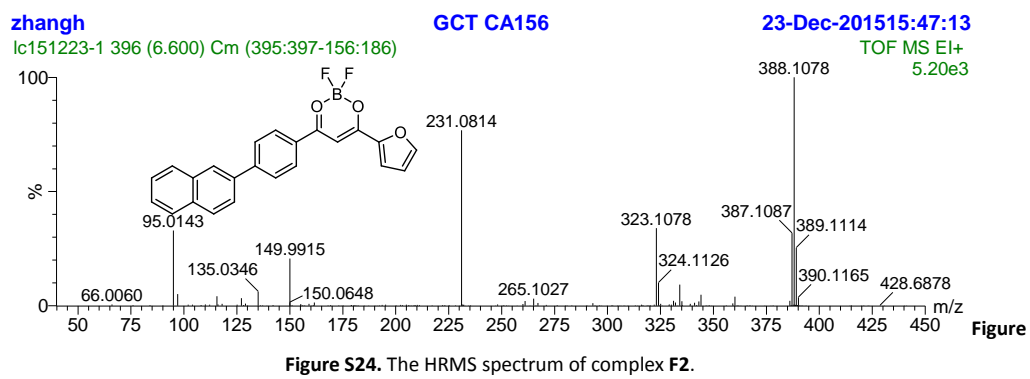

**Figure S24.** The HRMS spectrum of complex **F2**.



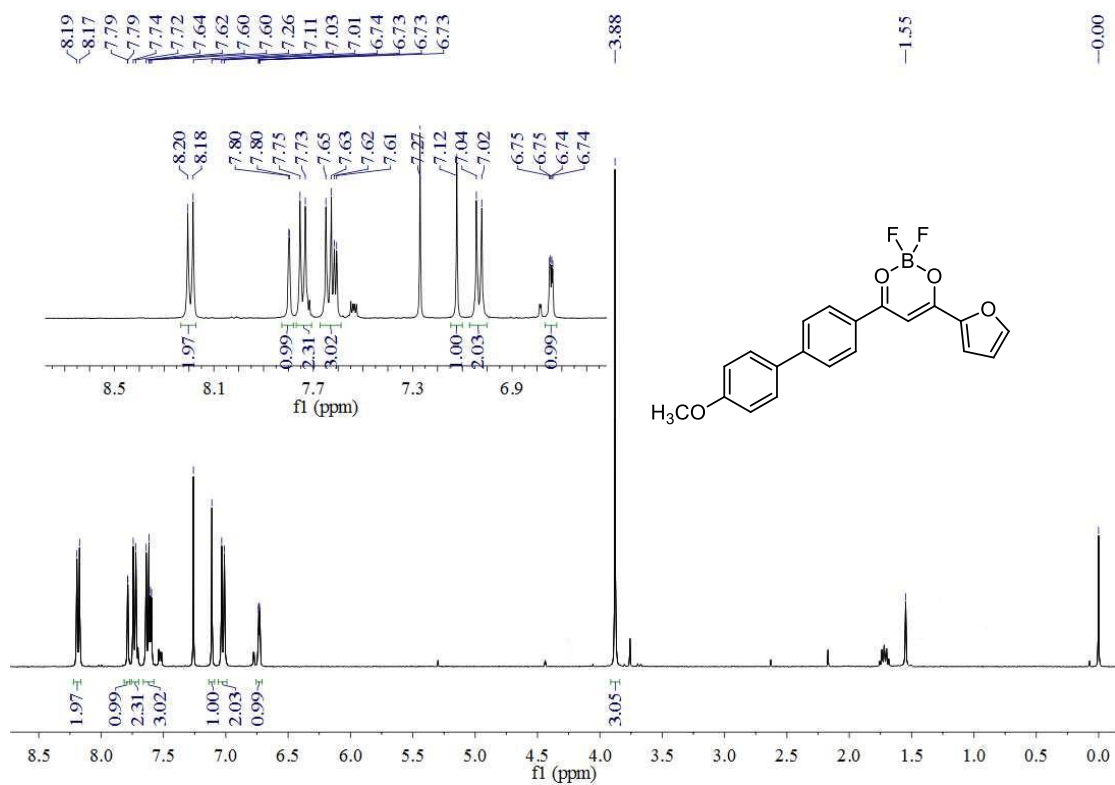

Figure S25. The <sup>1</sup>H NMR spectrum of complex F3 in CDCl<sub>3</sub>.

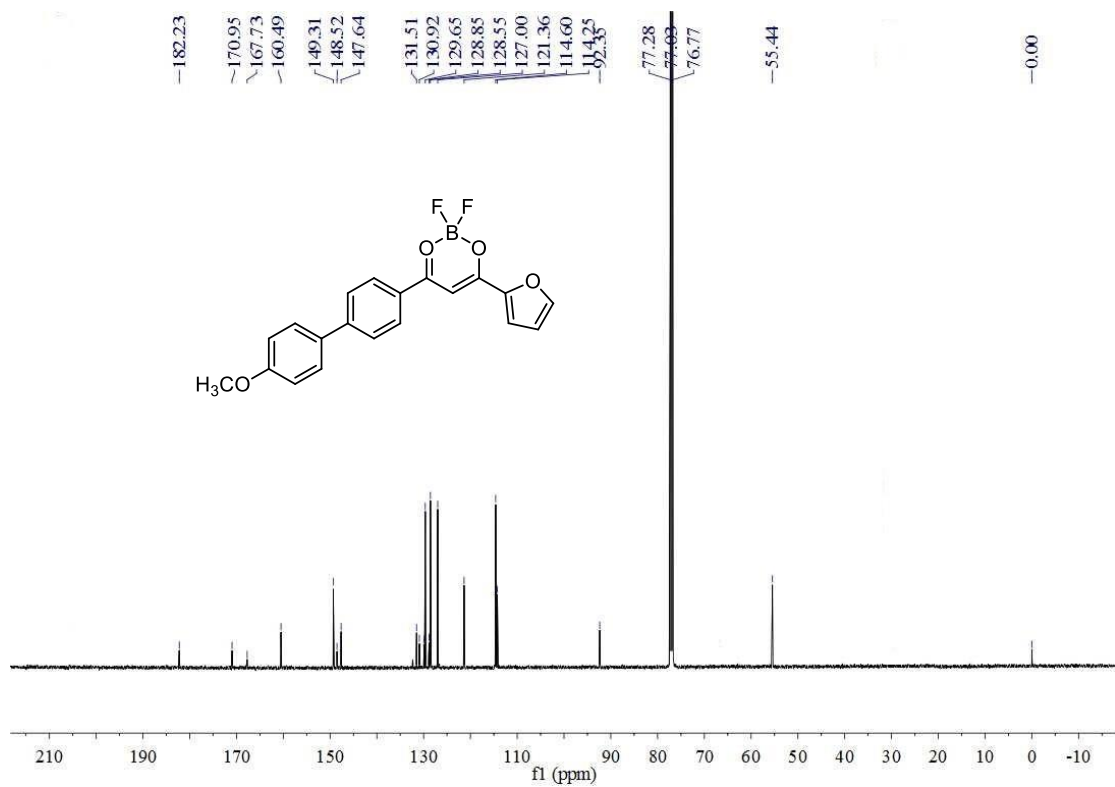

Figure S26. The <sup>13</sup>C NMR spectrum of complex F3 in CDCl<sub>3</sub>.

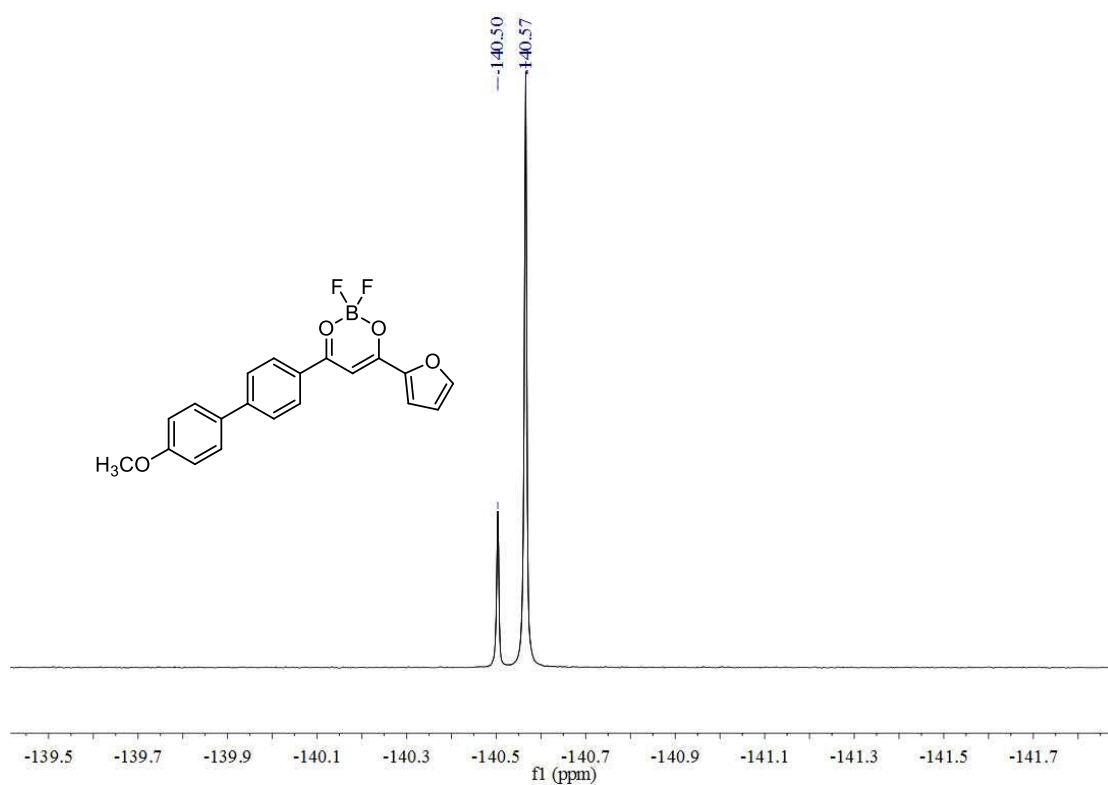

Figure S27. The  $^{19}\text{F}$  NMR spectrum of complex **F3** in  $\text{CDCl}_3$ .

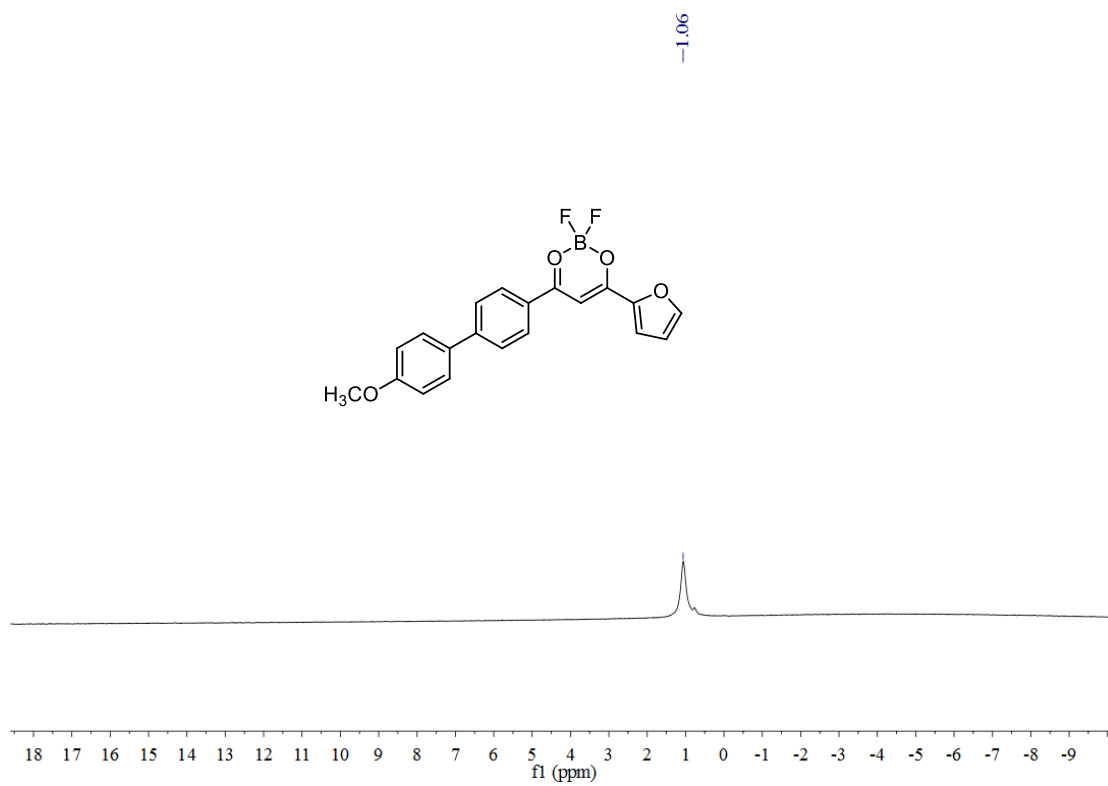

Figure S28. The  $^{11}\text{B}$  NMR spectrum of complex **F3** in  $\text{CDCl}_3$ .

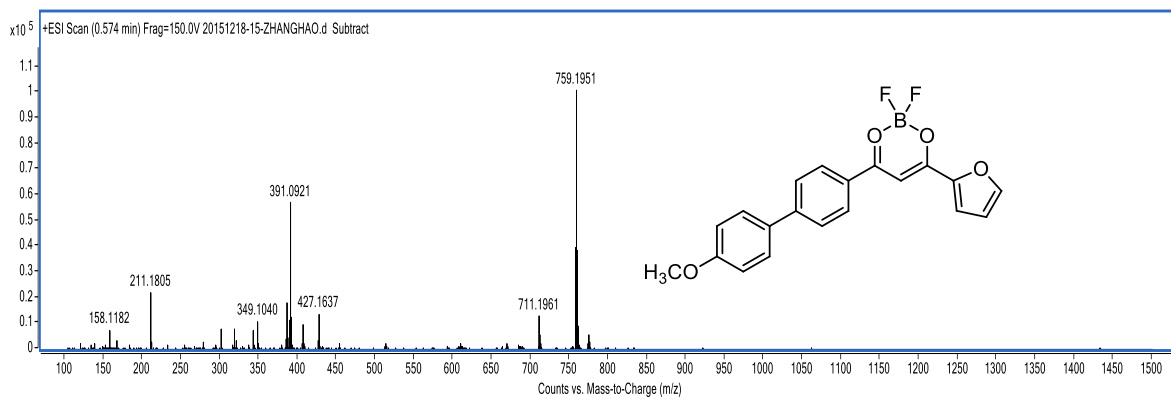

Figure S29. The HRMS spectrum of complex F3.

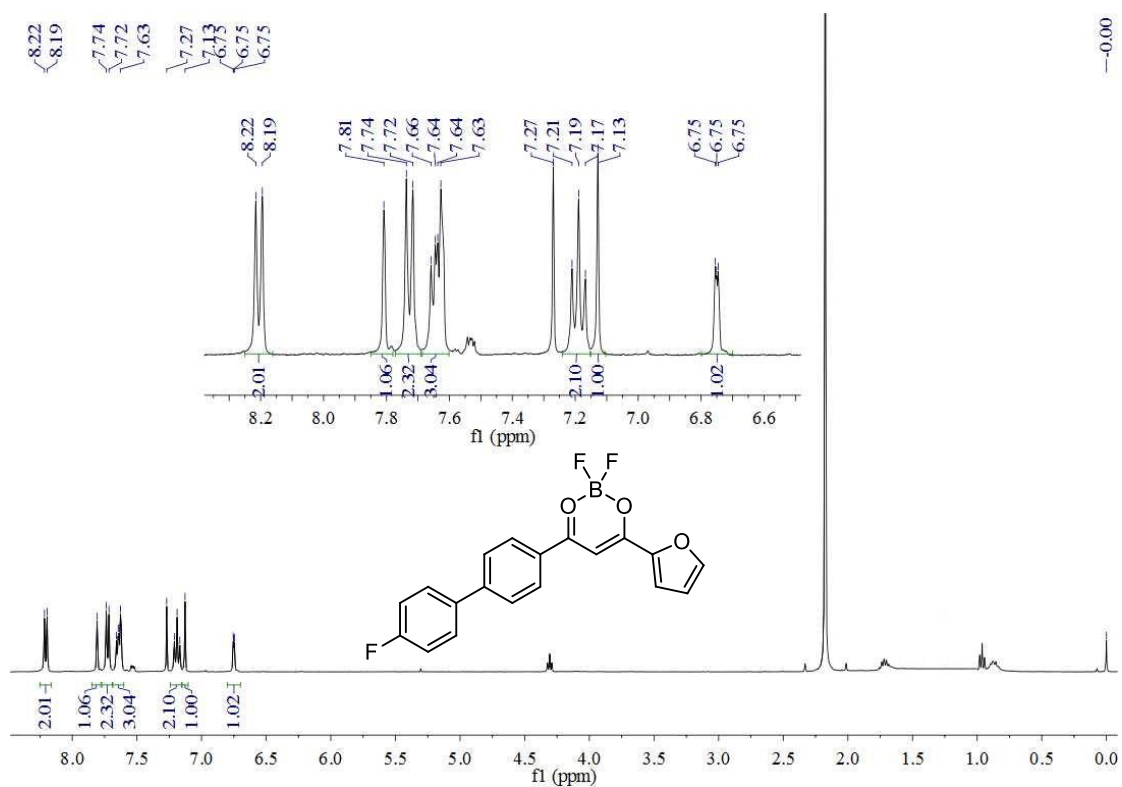

Figure S30. The  $^1\text{H}$  NMR spectrum of complex F4 in  $\text{CDCl}_3$ .

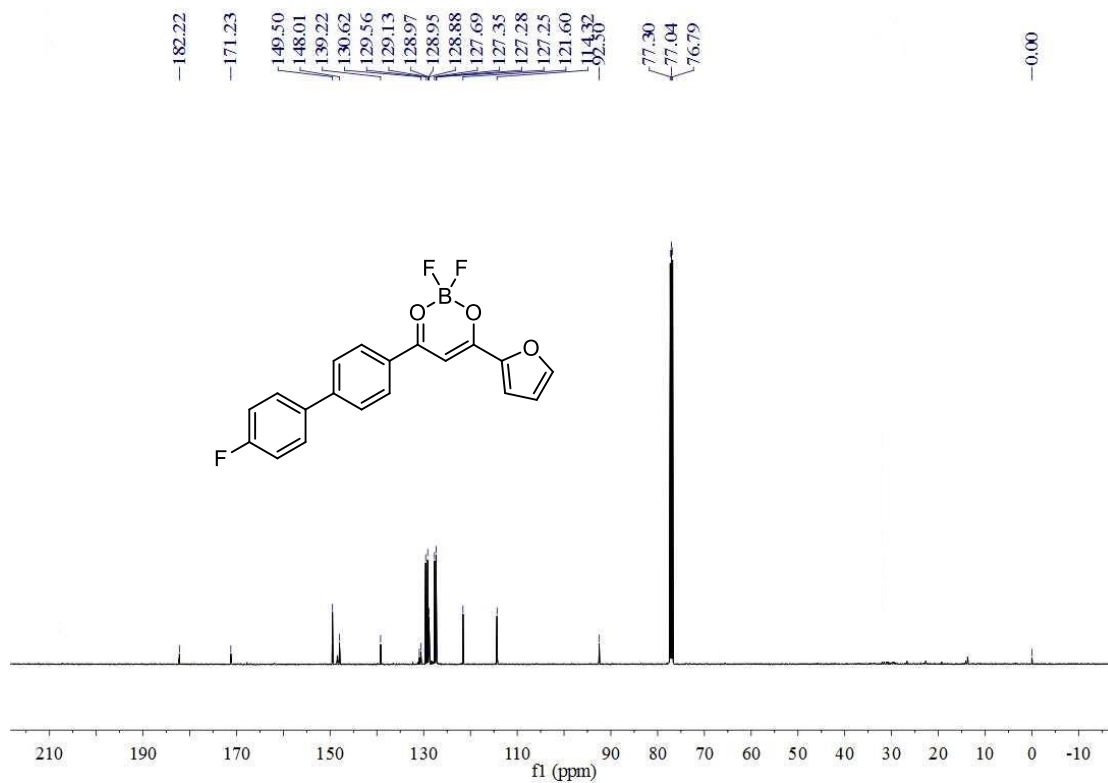

Figure S31. The <sup>13</sup>C NMR spectrum of complex F4 in CDCl<sub>3</sub>.

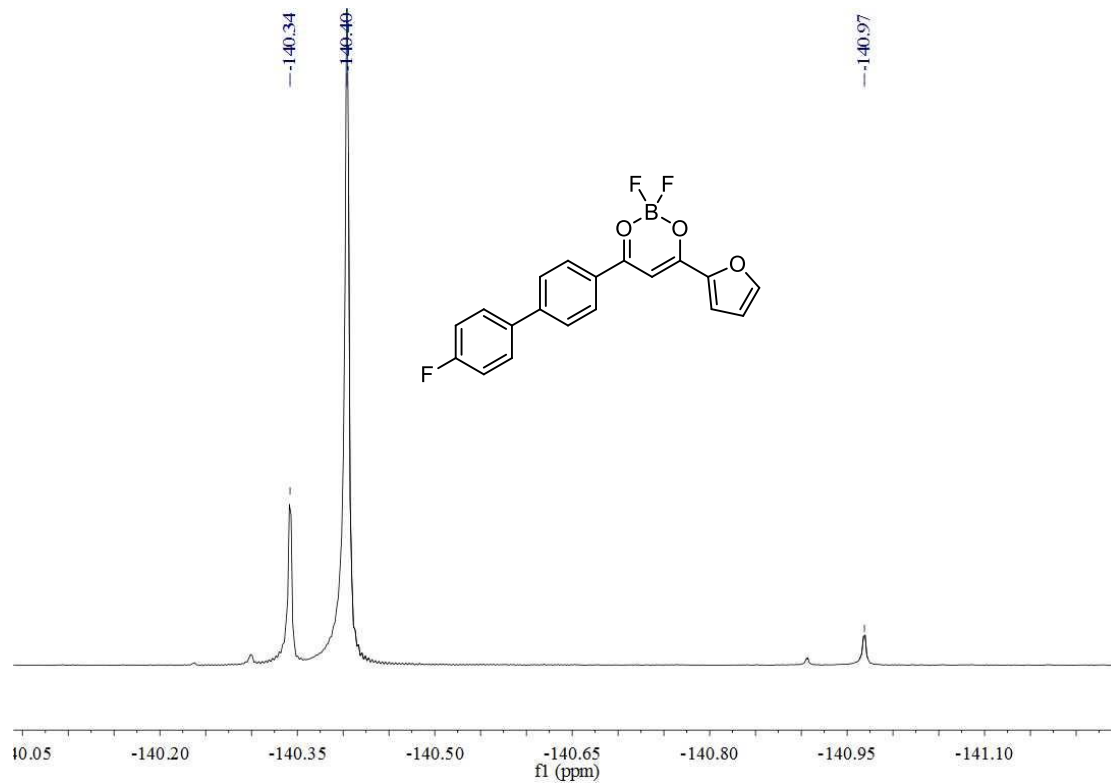

Figure S32. The <sup>19</sup>F NMR spectrum of complex F4 in CDCl<sub>3</sub>.

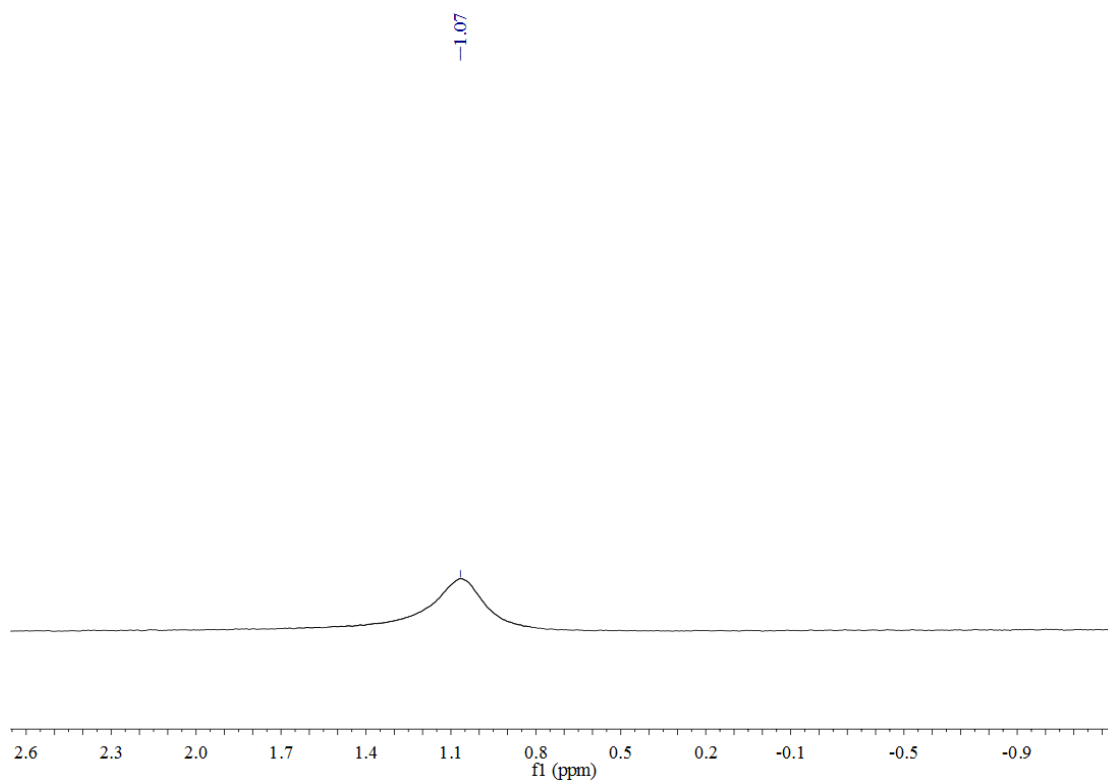

Figure S33. The  $^{11}\text{B}$  NMR spectrum of complex F4 in  $\text{CDCl}_3$ .

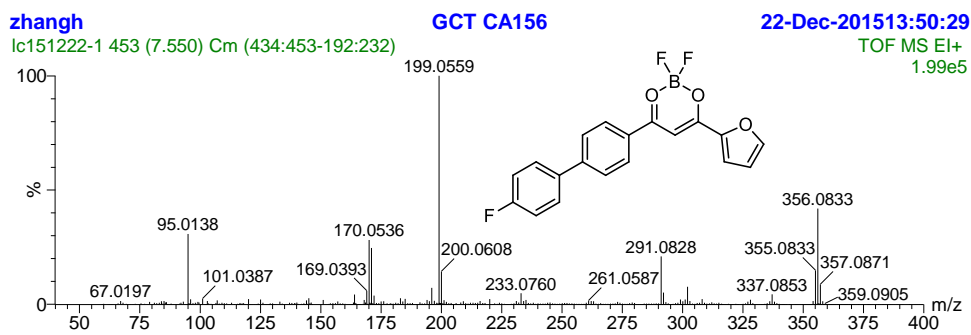

Figure S34. The HRMS spectrum of complex F4.

## References

- [1] X. Jiang, X. Liu, Y. Jiang, Y. Quan, Y. Cheng and C. Zhu, *Macromol. Chem. Phys.*, 2014, **215**, 358-364.
- [2] G. Zhang, J. Chen, S. J. Payne, S. E. Kooi, J. Demas and C. L. Fraser, *J. Am. Chem. Soc.*, 2007, **129**, 8942-8943.
